# Supplementary material for: A convenient synthesis of core–shell ZSM-5@ZnO catalysts for methane co-aromatization with propane
Source: Royal Society of Chemistry journal article supplement (doi:10.1039/d2nj03300c), 2022-01-01
Supplement: d2nj03300c1.pdf [file d2nj03300c1.pdf]

## Supporting Information

### 1. Catalyst evaluation

Using  $N_2$  as an internal standard for analyzing products, the products were analyzed on-line with a gas chromatograph (GC). The gaseous phase products monitored by online analysis using TDX-01 packed column equipped with a TCD detector and a PLOT-Q pillared column connected to an FID detector produced by Shimadzu. Aromatic hydrocarbons were analyzed with an FID detector on a DB-WAX column produced by Agilent[1].

### 2. Figure and table(s)

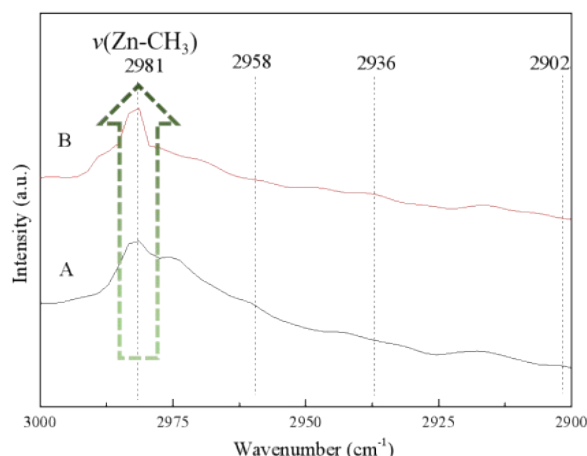

Fig. S1. In-situ IR spectra of the Zn/ZSM-5 catalyst recorded at 550°C. In-situ IR spectra scanning range 3000 to 2900  $cm^{-1}$ , A: mixed gas (30 mL/min,  $C_3H_8:N_2 = 3:2$ , mole ratio) was introduced into an in-situ cell (550 °C and atmospheric pressure) containing fresh catalyst for 30 min and measured for IR spectra; B: based on the experiment in a,  $CH_4$  (30 mL/min) was fed into the in-situ cell (550 °C and atmospheric pressure) containing above catalyst for 30 min, and then IR spectra were recorded.

Table S1. Assignments of In-situ infrared bands

| Band(cm <sup>-1</sup> ) | Assignment                                    |
|-------------------------|-----------------------------------------------|
| 2902                    | stretching vibration of CH group              |
| 2936                    | stretching vibration of CH <sub>2</sub> group |
| 2958                    | stretching vibration of CH <sub>3</sub> group |
| 2981                    | Zn methyl species                             |

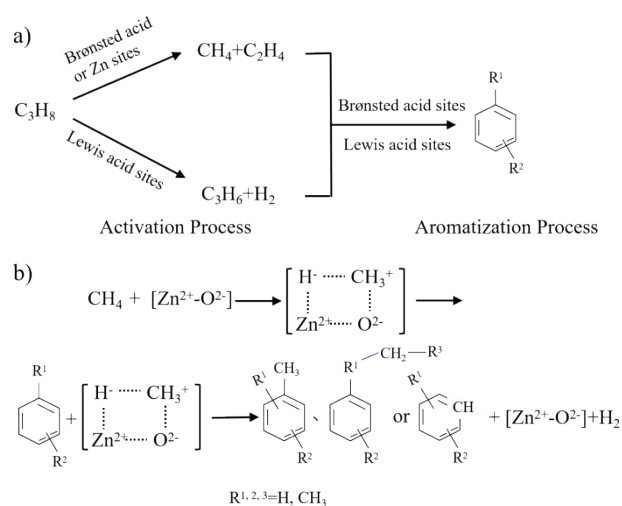

Fig. S2. Mechanism of methane co-aromatization with propane[2].

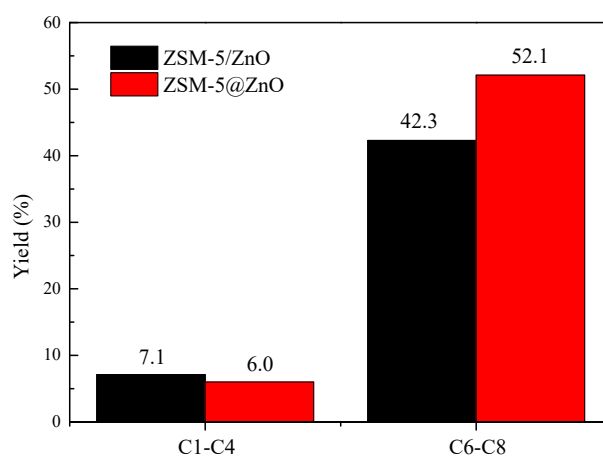

Fig. S3. The product yield in propane aromatization at 5 h over the different catalysts.

## Reference

- [1] L. Zheng, D. Xuan, J. Guo, H. Lou, X. Zheng, Non-Oxidative Aromatization of CH<sub>4</sub>-C<sub>3</sub>H<sub>8</sub> over La-Promoted Zn/HZSM-5 Catalysts, *Journal of Natural Gas Chemistry* 15(1) (2006) 52-57.
- [2] G. Xu, X. Zhu, A core-shell structured Zn/SiO<sub>2</sub>@ZSM-5 catalyst: Preparation and enhanced catalytic properties in methane co-aromatization with propane, *Applied Catalysis B: Environmental* 293 (2021) 120241.
